# Supplementary material for: A novel lanthanide-based NIR-II nanoprobe for lung squamous cell carcinoma identification
Source: Royal Society of Chemistry journal article supplement (doi:10.1039/d1bm00766a), 2021-01-01
Supplement: d1bm00766a1.pdf [file d1bm00766a1.pdf]

## Electronic Supplementary Information

### **A novel lanthanide based NIR-II nanoprobe for lung squamous-cell carcinoma identification**

Jun Zhu,<sup>a</sup> Lingfei Lu,<sup>b</sup> Yong Fan,<sup>b\*</sup> and Caicun Zhou<sup>a\*</sup>

a. Department of Oncology, Shanghai Pulmonary Hospital, Tongji University School of Medicine

b. Laboratory of Advanced Materials and Department of Chemistry, State Key Laboratory of Molecular Engineering of Polymers, Collaborative Innovation Center of Chemistry for Energy Materials (2011-iChEM), Fudan University, Shanghai 200433, P. R. China.

Table S1 Quantum yield of related Er nanoprobcs.

| Serial number | Structure composition                                                              | Quantum yield | Solvent      | Reference |
|---------------|------------------------------------------------------------------------------------|---------------|--------------|-----------|
| 1             | NaErF <sub>4</sub> @NaYF <sub>4</sub> @SCCA                                        | 0.051%        | Water        | This work |
| 2             | NaErF <sub>4</sub> @NaLnF <sub>4</sub>                                             | 10.2%         | Hexane       | 1         |
| 3             | NaErF <sub>4</sub> @NaYbF <sub>4</sub> @NaYF <sub>4</sub>                          | 18.7%         | -            | 2         |
| 4             | NaCeF <sub>4</sub> :Er/Yb                                                          | 32.8%         | Cyclohexane  | 3         |
| 5             | NaGdF <sub>4</sub> @NaGdF <sub>4</sub> :Yb/Er(18/45%)<br>@NaNF <sub>4</sub> :(10%) | 0.009%        | Cyclohexane: | 4         |

## Supplementary Note 1:

The quantum yield of the DCNPs@anti-SCCA probe was measured by using a standard dye IR-26 as the reference. Both were excited by a 980 nm laser under identical intensity (2 W/cm<sup>2</sup>). The quantum yield of the DCNPs@anti-SCCA probe was estimated as

$$Q_{probe} = Q_{ref} \times \frac{S_{probe}}{S_{ref}} \times \left( \frac{n_{probe}}{n_{ref}} \right)^2$$

where  $Q_{probe}$  is the quantum yield of the DCNPs@anti-SCCA probe,  $Q_{ref}$  is the quantum yield of IR-26 (~ 0.05%),  $S_{probe}$  and  $S_{ref}$  are the slopes obtained by linear fitting of the integrated emission spectra of DCNPs@anti-SCCA probe (1400 nm-1600 nm) and IR-26 (1000 nm -1500 nm) against the absorbance at 980 nm,  $n_{probe}$  and  $n_{ref}$  are the refractive indices of their respective solvents (water: 1; and dichloroethane: 1.4167).

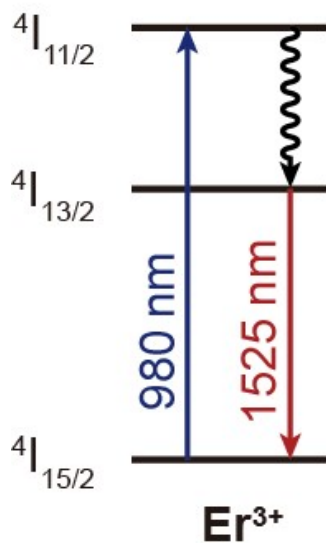

Figure S1 Schematic energy level diagram showing the possible downconversion mechanism of NaErF<sub>4</sub>@NaYF<sub>4</sub> nanoparticles.

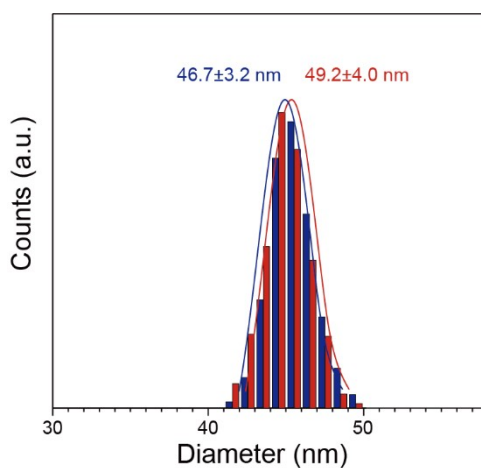

Figure S2 Corresponding size distributions of NaErF<sub>4</sub> (blue) and NaErF<sub>4</sub>@NaYF<sub>4</sub> (red) nanoparticles.

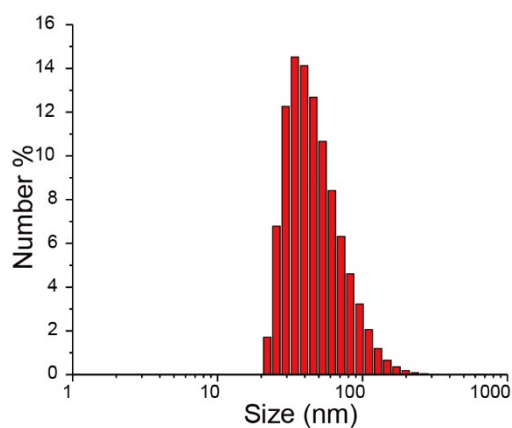

Figure S3 Dynamic light scattering (DLS) measurement of DCNPs@anti-SCCA nanoprobe in PBS.

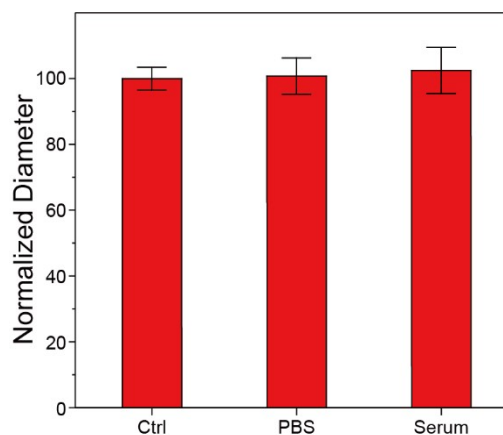

Figure S4 Dynamic light scattering (DLS) measurement of DCNPs@anti-SCCA after storing in PBS buffer and mouse serum at 37 °C for 3 days.

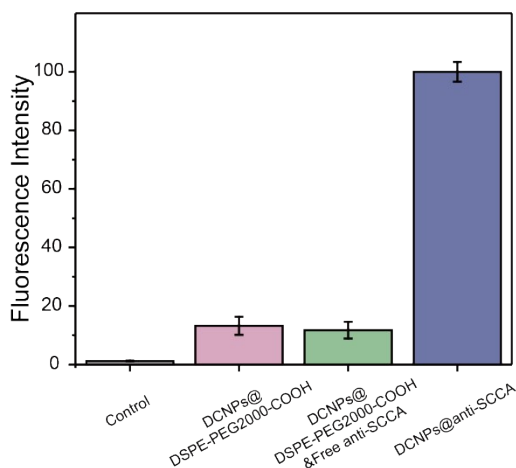

Figure S5 NIR-II fluorescence intensity of NCI-H1703 cells incubated with DCNPs@DSPE-PEG2000-COOH, DCNPs@DSPE-PEG2000-COOH & free anti-SCCA, and DCNPs@anti-SCCA.

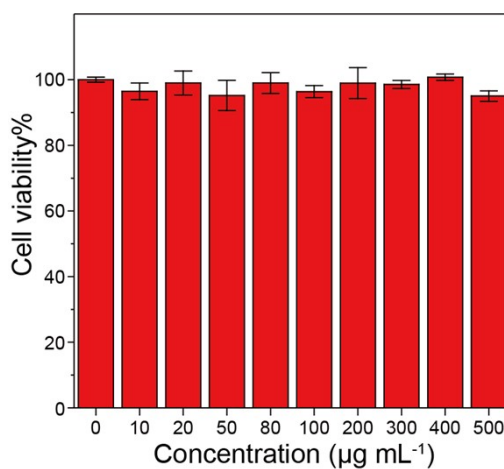

Figure S6 Cell viability of NCI-H1703 cells incubated with DCNPs@anti-SCCA for 24 h at 37 °C.

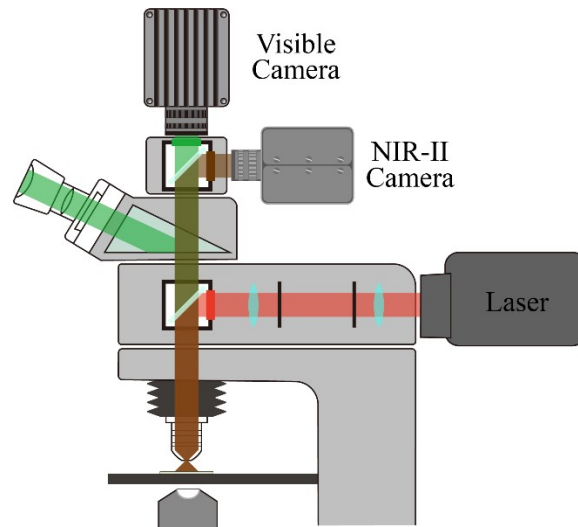

Figure S7 Scheme of fluorescence microscope with Si visible detector and InGaAs NIR-II detector.

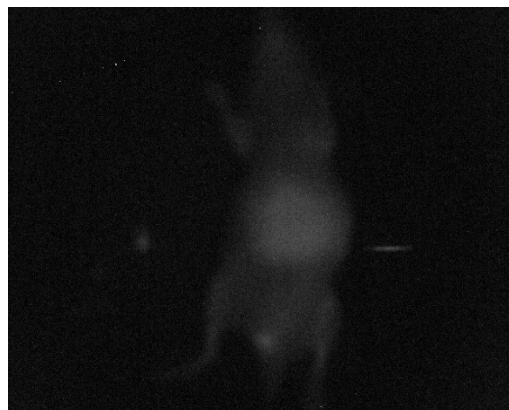

Figure S8 NIR-II fluorescence image of mouse model with lung squamous cell (NCI-H1703) carcinoma.

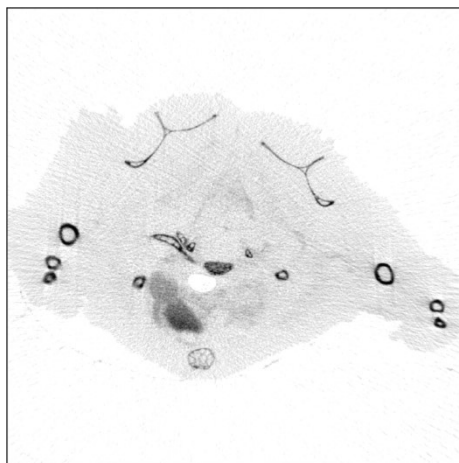

Figure S9 CT image of a BALB/c nude mouse with squamous non-small-cell lung cancer.

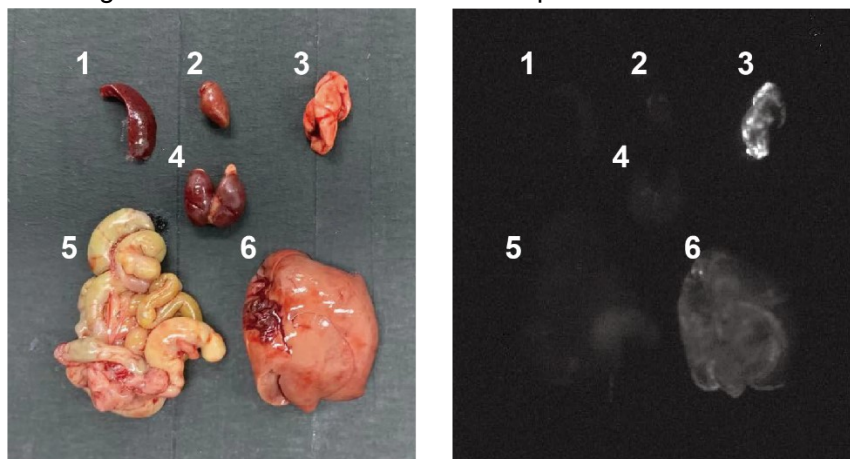

Figure S10 Bright field and NIR-II fluorescence images of different organs obtained by sacrificing mouse after in vivo imaging. Nos.1-6 refers to spleen, heart, lung, kidneys, intestine and liver.

- 1 H. Li, X. Wang, X. Li, S. Zeng and G. Chen, *Chemistry of Materials*, 2020, **32**, 3365-3375.
- 2 Y. Li, P. Zhang, H. Ning, J. Zeng, Y. Hou, L. Jing, C. Liu and M. Gao, *Small*, 2019, **15**, 1905344.
- 3 X. Lei, R. Li, D. Tu, X. Shang, Y. Liu, W. You, C. Sun, F. Zhang and X. Chen, *Chemical science*, 2018, **9**, 4682-4688.
- 4 Y. Fan, P. Wang, Y. Lu, R. Wang, L. Zhou, X. Zheng, X. Li, J. A. Piper and F. Zhang, *Nature nanotechnology*, 2018, **13**, 941-946.
